# Supplementary material for: Mortality of Dairy Sheep during the Peri-Parturient Period: Results of a Field Investigation in Greece
Source: MDPI journal article supplement (doi:10.3390/ani11082172), 2021-07-22
Supplement: s1 [file s1]

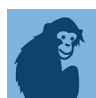

# Mortality of dairy sheep during the peri-parturient period: results of a field investigation in Greece

Antonis P. Politis <sup>1</sup>, Natalia G.C. Vasileiou <sup>2</sup>, Peter J. Cripps <sup>1</sup>, Dimitra V. Liagka <sup>1</sup>, Petros T. Boufis <sup>1</sup>, Irene Valasi <sup>1</sup>, Vasia S. Mavrogianni <sup>1,\*</sup> and George C. Fthenakis <sup>1</sup>

<sup>1</sup> Veterinary Faculty, University of Thessaly, 43100 Karditsa, Greece; apolitis.vet@gmail.com (A.P.P.); peterjohncripps@gmail.com (P.J.C.); dliagka@vet.uth.gr (D.V.L.); pboufisvet@gmail.com (P.T.B.); evalasi@vet.uth.gr (I.V.); gcf@vet.uth.gr (G.C.F.)

<sup>2</sup> Faculty of Animal Science, University of Thessaly, 41110 Larissa, Greece; vasileiounat@gmail.com

\* Correspondence: [vmavrog@vet.uth.gr](mailto:vmavrog@vet.uth.gr)

**Table S1.** Details of multivariable models employed for the evaluation of the occurrence of peri-parturient deaths in sheep flocks in Greece.

| Outcome                                                         | Variables offered to the multivariable models ( <i>n</i> ) | Variables required in the final models                                                                                                                                                       |
|-----------------------------------------------------------------|------------------------------------------------------------|----------------------------------------------------------------------------------------------------------------------------------------------------------------------------------------------|
| Death before lambing                                            | 5                                                          | (a) season of the year during which the lambing period took place, (b) number of animals in the flock                                                                                        |
| Death at lambing                                                | 4                                                          | (a) breed of ewes, (b) presence of working staff in the farm                                                                                                                                 |
| Death after lambing                                             | 6                                                          | (a) number of animals in the flock, (b) breed of ewes, (c) control or reproduction, (d) nutritional modifications performed during the last stage of pregnancy, (e) experience of the farmer |
| Occurrence of peri-parturient deaths                            |                                                            | (a) season of the year during which the lambing period took place, (b) average lambing rate at flock level, (c) inclusion of roughage into the diet                                          |
| Occurrence of peri-parturient deaths in both years of the study |                                                            | (a) experience of the farmer, (b) presence of working staff in the farm                                                                                                                      |

**Table S2.** Incidence risk of peri-parturient deaths in each of 60 sheep flocks during a two-year study in Greece.

| <b>Farm reference no.</b> | <b>1<sup>st</sup> year of the study</b> | <b>2<sup>nd</sup> year of the study</b> | <b>Both years</b> |
|---------------------------|-----------------------------------------|-----------------------------------------|-------------------|
| 1                         | 1.32%                                   | 0.00%                                   | 0.66%             |
| 2                         | 2.00%                                   | 5.00%                                   | 3.50%             |
| 3                         | 0.00%                                   | 0.00%                                   | 0.00%             |
| 4                         | 0.00%                                   | 0.00%                                   | 0.00%             |
| 5                         | 0.00%                                   | 0.00%                                   | 0.00%             |
| 6                         | 0.00%                                   | 1.80%                                   | 0.90%             |
| 7                         | 0.00%                                   | 0.75%                                   | 0.38%             |
| 8                         | 3.35%                                   | 3.28%                                   | 3.32%             |
| 9                         | 0.00%                                   | 0.00%                                   | 0.00%             |
| 10                        | 0.00%                                   | 0.00%                                   | 0.00%             |
| 11                        | 0.00%                                   | 0.00%                                   | 0.00%             |
| 12                        | 0.00%                                   | 0.00%                                   | 0.00%             |
| 13                        | 0.00%                                   | 1.56%                                   | 0.78%             |
| 14                        | 0.00%                                   | 0.00%                                   | 0.00%             |
| 15                        | 0.00%                                   | 0.00%                                   | 0.00%             |
| 16                        | 0.00%                                   | 0.00%                                   | 0.00%             |
| 17                        | 0.00%                                   | 0.00%                                   | 0.00%             |
| 18                        | 0.00%                                   | 0.95%                                   | 0.47%             |
| 19                        | 0.00%                                   | 0.00%                                   | 0.00%             |
| 20                        | 0.00%                                   | 0.00%                                   | 0.00%             |
| 21                        | 1.04%                                   | 1.02%                                   | 1.03%             |
| 22                        | 0.00%                                   | 1.31%                                   | 0.65%             |
| 23                        | 0.00%                                   | 2.63%                                   | 1.32%             |
| 24                        | 0.00%                                   | 4.08%                                   | 2.04%             |
| 25                        | 1.47%                                   | 0.47%                                   | 0.97%             |
| 26                        | 1.33%                                   | 2.07%                                   | 1.70%             |
| 27                        | 0.00%                                   | 0.00%                                   | 0.00%             |
| 28                        | 3.00%                                   | 0.00%                                   | 1.50%             |
| 29                        | 0.00%                                   | 0.00%                                   | 0.00%             |
| 30                        | 0.00%                                   | 1.14%                                   | 0.57%             |
| 31                        | 6.29%                                   | 0.00%                                   | 3.15%             |
| 32                        | 0.00%                                   | 0.00%                                   | 0.00%             |
| 33                        | 0.00%                                   | 0.00%                                   | 0.00%             |
| 34                        | 0.00%                                   | 0.00%                                   | 0.00%             |
| 35                        | 0.00%                                   | 0.00%                                   | 0.00%             |
| 36                        | 7.22%                                   | 0.00%                                   | 3.61%             |
| 37                        | 0.00%                                   | 0.00%                                   | 0.00%             |
| 38                        | 0.00%                                   | 0.00%                                   | 0.00%             |
| 39                        | 0.00%                                   | 0.00%                                   | 0.00%             |
| 40                        | 0.00%                                   | 0.00%                                   | 0.00%             |
| 41                        | 3.39%                                   | 3.13%                                   | 3.26%             |
| 42                        | 0.00%                                   | 0.00%                                   | 0.00%             |
| 43                        | 1.83%                                   | 2.28%                                   | 2.06%             |
| 44                        | 0.00%                                   | 1.49%                                   | 0.74%             |
| 45                        | 0.00%                                   | 0.00%                                   | 0.00%             |
| 46                        | 0.00%                                   | 0.00%                                   | 0.00%             |
| 47                        | 0.00%                                   | 0.00%                                   | 0.00%             |
| 48                        | 0.00%                                   | 0.00%                                   | 0.00%             |
| 49                        | 0.00%                                   | 4.46%                                   | 2.23%             |
| 50                        | 0.00%                                   | 0.00%                                   | 0.00%             |
| 51                        | 8.84%                                   | 3.19%                                   | 6.01%             |
| 52                        | 6.47%                                   | 2.87%                                   | 4.67%             |
| 53                        | 0.00%                                   | 3.90%                                   | 1.95%             |
| 54                        | 0.00%                                   | 0.00%                                   | 0.00%             |
| 55                        | 0.00%                                   | 1.31%                                   | 0.65%             |

|    |       |       |       |
|----|-------|-------|-------|
| 56 | 2.44% | 0.00% | 1.22% |
| 57 | 0.00% | 9.17% | 4.58% |
| 58 | 1.23% | 1.75% | 1.49% |
| 59 | 0.00% | 0.00% | 0.00% |
| 60 | 0.00% | 0.00% | 0.00% |

**Table S3.** Frequency <sup>1</sup> of peri-parturient deaths in relation to the time of lambing, during a two-year study in 60 sheep flocks in Greece.

| 1 <sup>st</sup> year of the study                                 |      |       | 2 <sup>nd</sup> year of the study |      |       | Both years              |      |       |
|-------------------------------------------------------------------|------|-------|-----------------------------------|------|-------|-------------------------|------|-------|
| Time of death in relation to lambing                              |      |       |                                   |      |       |                         |      |       |
| Before                                                            | At   | After | Before                            | At   | After | Before                  | At   | After |
| <i>n</i><br>Total = 89                                            |      |       | <i>n</i><br>Total = 109           |      |       | <i>n</i><br>Total = 198 |      |       |
| 65                                                                | 4    | 20    | 70                                | 7    | 32    | 135                     | 11   | 52    |
| Proportion of peri-parturient deaths within the respective period |      |       |                                   |      |       |                         |      |       |
| 73.0%                                                             | 4.5% | 22.5% | 64.2%                             | 6.4% | 29.4% | 68.2%                   | 5.5% | 26.3% |

<sup>1</sup> The figures refer only to deaths that occurred within the 18-day long peri-parturient period.

**Table S4.** Frequency <sup>1</sup> of clinical problems associated with peri-parturient deaths, in relation to the time of parturition during a two-year study in 60 sheep flocks in Greece.

| Clinical problems                                                                    | Time of death in relation to lambing |    |       |
|--------------------------------------------------------------------------------------|--------------------------------------|----|-------|
|                                                                                      | Before                               | At | After |
| Pregnancy toxemia                                                                    | 82                                   |    |       |
| Ruminal acidosis                                                                     | 23                                   |    |       |
| Genital tract problems (genital injury, uterine prolapse, rectal prolapse, metritis) |                                      |    | 23    |
| Acute clinical mastitis                                                              |                                      |    | 21    |
| Respiratory infections                                                               | 19                                   |    |       |
| Dystocia                                                                             |                                      | 11 |       |
| Copper poisoning                                                                     | 7                                    |    |       |
| Hypocalcaemia                                                                        |                                      |    | 5     |
| Babesiosis                                                                           | 4                                    |    |       |
| Predation by wild animals                                                            |                                      |    | 2     |
| Coenurosis                                                                           |                                      |    | 1     |
| Total                                                                                | 135                                  | 11 | 52    |

<sup>1</sup> The figures refer only to deaths that occurred within the 18-day long peri-parturient period.

**Table S5.** Incidence risk of deaths of ewes during the ‘before lambing’ component of the peri-parturient period during a two-year study in 60 sheep farms in Greece, in accord with factors ( $n = 15$ ) evaluated for potential association with these deaths.

| Management system applied in the flock                                                 |                                                          |                                                  |                             |
|----------------------------------------------------------------------------------------|----------------------------------------------------------|--------------------------------------------------|-----------------------------|
| Intensive ( $n = 13$ )<br>0.9%                                                         | Semi-intensive ( $n = 12$ )<br>0.3%                      | Semi-extensive or extensive ( $n = 35$ )<br>0.5% | $p$<br>0.002                |
| Season of the year during which the lambing period took place                          |                                                          |                                                  |                             |
| Winter ( $n = 5$ )<br>1.3%                                                             | Spring ( $n = 0$ )<br>n/a                                | Summer ( $n = 19$ )<br>0.7%                      | Autumn ( $n = 36$ )<br>0.3% |
|                                                                                        |                                                          |                                                  | $p$<br><0.0001              |
| Number of animals in the flock                                                         |                                                          |                                                  |                             |
| ≤200 ewes ( $n = 38$ )<br>0.7%                                                         | 200–500 ewes ( $n = 17$ )<br>0.5%                        | >500 ewes ( $n = 5$ )<br>0.3%                    | $p$<br>0.034                |
| Breed of ewes                                                                          |                                                          |                                                  |                             |
| Greek pure-breed animals ( $n = 15$ )<br>0.6%                                          | Imported pure-breed animals ( $n = 18$ )<br>0.5%         | Crossbreds ( $n = 27$ )<br>0.5%                  | $P$<br>0.96                 |
| Average lambing rate at flock level                                                    |                                                          |                                                  |                             |
| ≤1.5 ( $n = 45$ )<br>0.5%                                                              | >1.5 ( $n = 15$ )<br>0.8%                                |                                                  | $p$<br>0.034                |
| Control of reproduction                                                                |                                                          |                                                  |                             |
| Intravaginal use of progestogen sponges ( $n = 13$ )<br>0.4%                           | Administration of melatonin implants ( $n = 9$ )<br>0.5% | No ( $n = 38$ )<br>0.6%                          | $p$<br>0.26                 |
| Feed origin                                                                            |                                                          |                                                  |                             |
| Homemade ( $n = 26$ )<br>0.6%                                                          | Commercial ( $n = 34$ )<br>0.5%                          |                                                  | $p$<br>0.52                 |
| Inclusion of roughage into the diet                                                    |                                                          |                                                  |                             |
| Yes ( $n = 58$ )<br>0.6%                                                               | No ( $n = 2$ )<br>0.4%                                   |                                                  | $p$<br>0.77                 |
| Intramammary administration of antibiotics at the end of the previous lactation period |                                                          |                                                  |                             |
| Yes ( $n = 21$ )<br>0.6%                                                               | No ( $n = 39$ )<br>0.5%                                  |                                                  | $p$<br>0.96                 |
| Nutritional modifications performed during the last stage of pregnancy                 |                                                          |                                                  |                             |
| Yes ( $n = 28$ )<br>0.5%                                                               | No ( $n = 32$ )<br>0.6%                                  |                                                  | $p$<br>0.39                 |
| Administration of anthelmintics at the end of pregnancy                                |                                                          |                                                  |                             |
| Yes ( $n = 60$ )<br>0.5%                                                               | No ( $n = 0$ )<br>n/a                                    |                                                  | $p$<br>n/a                  |
| Administration of anti-clostridial vaccination at the end of pregnancy                 |                                                          |                                                  |                             |
| Yes ( $n = 60$ )<br>0.5%                                                               | No ( $n = 0$ )<br>n/a                                    |                                                  | $p$<br>n/a                  |
| Administration of anti-mastitis vaccination at the end of pregnancy                    |                                                          |                                                  |                             |
| Yes ( $n = 25$ )<br>0.5%                                                               | No ( $n = 35$ )<br>0.6%                                  |                                                  | $p$<br>0.25                 |
| Experience of the farmer                                                               |                                                          |                                                  |                             |
| 0–10 years ( $n = 13$ )<br>0.7%                                                        | 11–20 years ( $n = 30$ )<br>0.3%                         | >20 years ( $n = 17$ )<br>1.0%                   | $P$<br><0.0001              |
| Presence of working staff in the farm                                                  |                                                          |                                                  |                             |
| Yes ( $n = 39$ )<br>0.6%                                                               | No ( $n = 21$ )<br>0.5%                                  |                                                  | $p$<br>0.52                 |

**Table S6.** Incidence risk of deaths of ewes during the ‘at lambing’ component of the peri-parturient period during a two-year study in 60 sheep farms in Greece, in accord with factors ( $n = 15$ ) evaluated for potential association with these deaths.

| <b>Management system applied in the flock</b>                                                 |                                                          |                                                  |                             |
|-----------------------------------------------------------------------------------------------|----------------------------------------------------------|--------------------------------------------------|-----------------------------|
| Intensive ( $n = 13$ )<br>0.1%                                                                | Semi-intensive ( $n = 12$ )<br>0.0%                      | Semi-extensive or extensive ( $n = 35$ )<br>0.1% | $p$<br>0.93                 |
| <b>Season of the year during which the lambing period took place</b>                          |                                                          |                                                  |                             |
| Winter ( $n = 5$ )<br>0.1%                                                                    | Spring ( $n = 0$ )<br>n/a                                | Summer ( $n = 19$ )<br>1.0%                      | Autumn ( $n = 36$ )<br>0.0% |
|                                                                                               |                                                          |                                                  | $p$<br>0.075                |
| <b>Number of animals in the flock</b>                                                         |                                                          |                                                  |                             |
| $\leq 200$ ewes ( $n = 38$ )<br>0.1%                                                          | 200–500 ewes ( $n = 17$ )<br>0.1%                        | $> 500$ ewes ( $n = 5$ )<br>0.0%                 | $p$<br>0.29                 |
| <b>Breed of ewes</b>                                                                          |                                                          |                                                  |                             |
| Greek pure-breed animals ( $n = 15$ )<br>0.1%                                                 | Imported pure-breed animals ( $n = 18$ )<br>0.1%         | Crossbreds ( $n = 27$ )<br>0.0%                  | $P$<br>0.095                |
| <b>Average lambing rate at flock level</b>                                                    |                                                          |                                                  |                             |
| $\leq 1.5$ ( $n = 45$ )<br>0.1%                                                               |                                                          | $> 1.5$ ( $n = 15$ )<br>0.0%                     | $p$<br>0.49                 |
| <b>Control of reproduction</b>                                                                |                                                          |                                                  |                             |
| Intravaginal use of progestogen sponges ( $n = 13$ )<br>0.0%                                  | Administration of melatonin implants ( $n = 9$ )<br>0.1% | No ( $n = 38$ )<br>0.0%                          | $p$<br>0.17                 |
| <b>Feed origin</b>                                                                            |                                                          |                                                  |                             |
| Homemade ( $n = 26$ )<br>0.0%                                                                 |                                                          | Commercial ( $n = 34$ )<br>0.1%                  | $p$<br>0.40                 |
| <b>Inclusion of roughage into the diet</b>                                                    |                                                          |                                                  |                             |
| Yes ( $n = 58$ )<br>0.1%                                                                      |                                                          | No ( $n = 2$ )<br>0.0%                           | $p$<br>0.62                 |
| <b>Intramammary administration of antibiotics at the end of the previous lactation period</b> |                                                          |                                                  |                             |
| Yes ( $n = 21$ )<br>0.1%                                                                      |                                                          | No ( $n = 39$ )<br>0.0%                          | $p$<br>0.38                 |
| <b>Nutritional modifications performed during the last stage of pregnancy</b>                 |                                                          |                                                  |                             |
| Yes ( $n = 28$ )<br>0.1%                                                                      |                                                          | No ( $n = 32$ )<br>0.0%                          | $p$<br>0.69                 |
| <b>Administration of anthelmintics at the end of pregnancy</b>                                |                                                          |                                                  |                             |
| Yes ( $n = 60$ )<br>0.5%                                                                      |                                                          | No ( $n = 0$ )<br>n/a                            | $p$<br>n/a                  |
| <b>Administration of anti-clostridial vaccination at the end of pregnancy</b>                 |                                                          |                                                  |                             |
| Yes ( $n = 60$ )<br>0.5%                                                                      |                                                          | No ( $n = 0$ )<br>n/a                            | $p$<br>n/a                  |
| <b>Administration of anti-mastitis vaccination at the end of pregnancy</b>                    |                                                          |                                                  |                             |
| Yes ( $n = 25$ )<br>0.1%                                                                      |                                                          | No ( $n = 35$ )<br>0.1%                          | $p$<br>0.95                 |
| <b>Experience of the farmer</b>                                                               |                                                          |                                                  |                             |
| 0–10 years ( $n = 13$ )<br>0.0%                                                               | 11–20 years ( $n = 30$ )<br>0.1%                         | $> 20$ years ( $n = 17$ )<br>0.0%                | $P$<br>0.58                 |
| <b>Presence of working staff in the farm</b>                                                  |                                                          |                                                  |                             |
| Yes ( $n = 39$ )<br>0.0%                                                                      |                                                          | No ( $n = 21$ )<br>0.1%                          | $p$<br>0.035                |

**Table S7.** Incidence risk of deaths of ewes during the ‘after lambing’ component of the peri-parturient period during a two-year study in 60 sheep farms in Greece, in accord with factors ( $n = 15$ ) evaluated for potential association with these deaths.

| <b>Management system applied in the flock</b>                                                 |                                                          |                                                  |                             |
|-----------------------------------------------------------------------------------------------|----------------------------------------------------------|--------------------------------------------------|-----------------------------|
| Intensive ( $n = 13$ )<br>0.3%                                                                | Semi-intensive ( $n = 12$ )<br>0.1%                      | Semi-extensive or extensive ( $n = 35$ )<br>0.2% | $p$<br>0.30                 |
| <b>Season of the year during which the lambing period took place</b>                          |                                                          |                                                  |                             |
| Winter ( $n = 5$ )<br>0.3%                                                                    | Spring ( $n = 0$ )<br>n/a                                | Summer ( $n = 19$ )<br>0.3%                      | Autumn ( $n = 36$ )<br>0.2% |
|                                                                                               |                                                          |                                                  | $p$<br>0.48                 |
| <b>Number of animals in the flock</b>                                                         |                                                          |                                                  |                             |
| $\leq 200$ ewes ( $n = 38$ )<br>0.4%                                                          | 200–500 ewes ( $n = 17$ )<br>0.1%                        | $> 500$ ewes ( $n = 5$ )<br>0.1%                 | $p$<br>0.022                |
| <b>Breed of ewes</b>                                                                          |                                                          |                                                  |                             |
| Greek pure-breed animals ( $n = 15$ )<br>0.3%                                                 | Imported pure-breed animals ( $n = 18$ )<br>0.1%         | Crossbreds ( $n = 27$ )<br>0.2%                  | $P$<br>0.19                 |
| <b>Average lambing rate at flock level</b>                                                    |                                                          |                                                  |                             |
| $\leq 1.5$ ( $n = 45$ )<br>0.2%                                                               |                                                          | $> 1.5$ ( $n = 15$ )<br>0.4%                     | $p$<br>0.018                |
| <b>Control of reproduction</b>                                                                |                                                          |                                                  |                             |
| Intravaginal use of progestogen sponges ( $n = 13$ )<br>0.2%                                  | Administration of melatonin implants ( $n = 9$ )<br>0.4% | No ( $n = 38$ )<br>0.2%                          | $p$<br>0.079                |
| <b>Feed origin</b>                                                                            |                                                          |                                                  |                             |
| Homemade ( $n = 26$ )<br>0.2%                                                                 |                                                          | Commercial ( $n = 34$ )<br>0.2%                  | $p$<br>0.70                 |
| <b>Inclusion of roughage into the diet</b>                                                    |                                                          |                                                  |                             |
| Yes ( $n = 58$ )<br>0.2%                                                                      |                                                          | No ( $n = 2$ )<br>0.5%                           | $p$<br>0.28                 |
| <b>Intramammary administration of antibiotics at the end of the previous lactation period</b> |                                                          |                                                  |                             |
| Yes ( $n = 21$ )<br>0.2%                                                                      |                                                          | No ( $n = 39$ )<br>0.2%                          | $p$<br>0.95                 |
| <b>Nutritional modifications performed during the last stage of pregnancy</b>                 |                                                          |                                                  |                             |
| Yes ( $n = 28$ )<br>0.3%                                                                      |                                                          | No ( $n = 32$ )<br>0.1%                          | $p$<br>0.005                |
| <b>Administration of anthelmintics at the end of pregnancy</b>                                |                                                          |                                                  |                             |
| Yes ( $n = 60$ )<br>0.5%                                                                      |                                                          | No ( $n = 0$ )<br>n/a                            | $p$<br>n/a                  |
| <b>Administration of anti-clostridial vaccination at the end of pregnancy</b>                 |                                                          |                                                  |                             |
| Yes ( $n = 60$ )<br>0.5%                                                                      |                                                          | No ( $n = 0$ )<br>n/a                            | $p$<br>n/a                  |
| <b>Administration of anti-mastitis vaccination at the end of pregnancy</b>                    |                                                          |                                                  |                             |
| Yes ( $n = 25$ )<br>0.2%                                                                      |                                                          | No ( $n = 35$ )<br>0.2%                          | $p$<br>0.43                 |
| <b>Experience of the farmer</b>                                                               |                                                          |                                                  |                             |
| 0–10 years ( $n = 13$ )<br>0.3%                                                               | 11–20 years ( $n = 30$ )<br>0.1%                         | $> 20$ years ( $n = 17$ )<br>0.3%                | $P$<br>0.074                |
| <b>Presence of working staff in the farm</b>                                                  |                                                          |                                                  |                             |
| Yes ( $n = 39$ )<br>0.2%                                                                      |                                                          | No ( $n = 21$ )<br>0.2%                          | $p$<br>0.72                 |

**Table S8.** Summary of results of analysis for associations with peri-parturient deaths during a two-year study in 60 sheep farms in Greece, with the results of each year of the study considered separately.

| <b>Occurrence of deaths: before lambing</b>                            |          |
|------------------------------------------------------------------------|----------|
| <b>1<sup>st</sup> year of the study</b>                                |          |
| Significant variables in the univariable analysis                      | <i>p</i> |
| Management system applied in the flock                                 | <0.0001  |
| Season of the year during which the lambing period took place          | <0.0001  |
| Experience of the farmer                                               | <0.0001  |
| Significant variables in the multivariable analysis                    | <i>p</i> |
| Management system applied in the flock                                 | 0.018    |
| Season of the year during which the lambing period took place          | 0.046    |
| Experience of the farmer                                               | 0.025    |
| <b>2<sup>nd</sup> year of the study</b>                                |          |
| Significant variables in the univariable analysis                      | <i>p</i> |
| Season of the year during which the lambing period took place          | <0.0001  |
| Experience of the farmer                                               | 0.022    |
| Most significant variable in the multivariable analysis                | <i>p</i> |
| Season of the year during which the lambing period took place          | 0.095    |
| <b>Occurrence of deaths: at lambing</b>                                |          |
| <b>1<sup>st</sup> year of the study</b>                                |          |
| Significant variables in the univariable analysis                      | <i>p</i> |
| Most significant variable in the multivariable analysis                | <i>p</i> |
| Presence of working staff in the farm                                  | 0.28     |
| <b>2<sup>nd</sup> year of the study</b>                                |          |
| Significant variables in the univariable analysis                      | <i>p</i> |
| Season of the year during which the lambing period took place          | 0.001    |
| Breed of ewes                                                          | 0.022    |
| Control of reproduction                                                | 0.0005   |
| Presence of working staff in the farm                                  | 0.002    |
| Significant variable in the multivariable analysis                     | <i>p</i> |
| Presence of working staff in the farm                                  | 0.030    |
| <b>Occurrence of deaths: after lambing</b>                             |          |
| <b>1<sup>st</sup> year of the study</b>                                |          |
| Significant variables in the univariable analysis                      | <i>p</i> |
| Number of animals in the flock                                         | 0.004    |
| Breed of ewes                                                          | <0.0001  |
| Control of reproduction                                                | 0.002    |
| Nutritional modifications performed during the last stage of pregnancy | 0.002    |
| Experience of the farmer                                               | 0.022    |
| Most significant variable in the multivariable analysis                | <i>p</i> |
| Control of reproduction                                                | 0.063    |
| <b>2<sup>nd</sup> year of the study</b>                                |          |
| Significant variables in the univariable analysis                      | <i>p</i> |
| Number of animals in the flock                                         | 0.046    |
| Nutritional modifications performed during the last stage of pregnancy | 0.031    |
| Significant variable in the multivariable analysis                     | <i>p</i> |
| Nutritional modifications performed during the last stage of pregnancy | 0.046    |
